# Supplementary material for: svclassify: a method to establish benchmark structural variant calls
Source: PubMed Central journal article supplement (PMC4715349; doi:10.1186/s12864-016-2366-2), 2016-01-16
Supplement: 12864_2016_2366_MOESM6_ESM.pdf [file 12864_2016_2366_MOESM6_ESM.pdf]

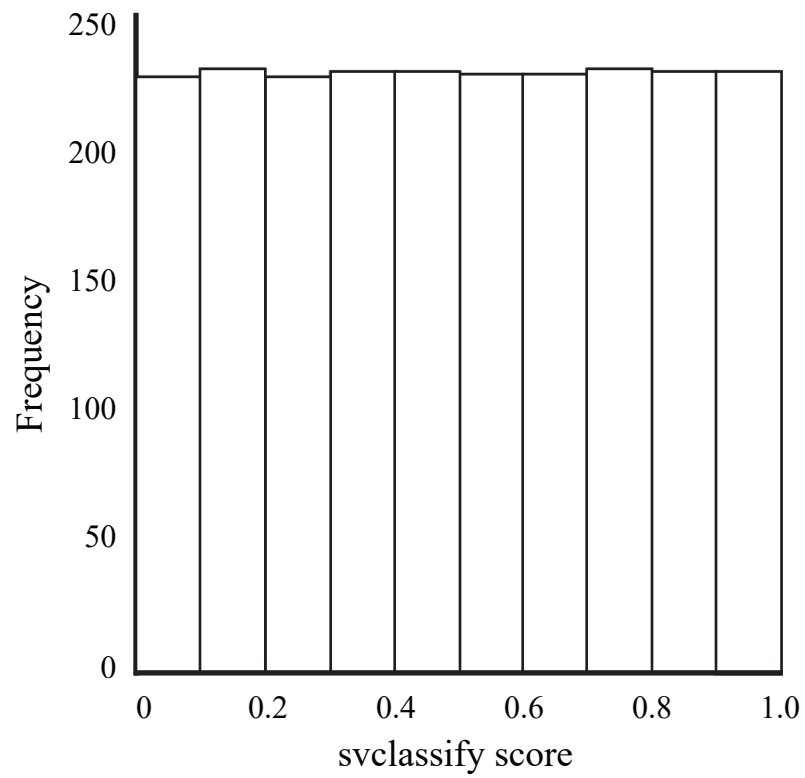

**Supplementary figure 1:** Histogram of  $\rho$  score for 2306 random regions with same size distribution as Personalis SVs.
