# Supplementary material for: svclassify: a method to establish benchmark structural variant calls
Source: PubMed Central journal article supplement (PMC4715349; doi:10.1186/s12864-016-2366-2), 2016-01-16
Supplement: 12864_2016_2366_MOESM7_ESM.pdf [file 12864_2016_2366_MOESM7_ESM.pdf]

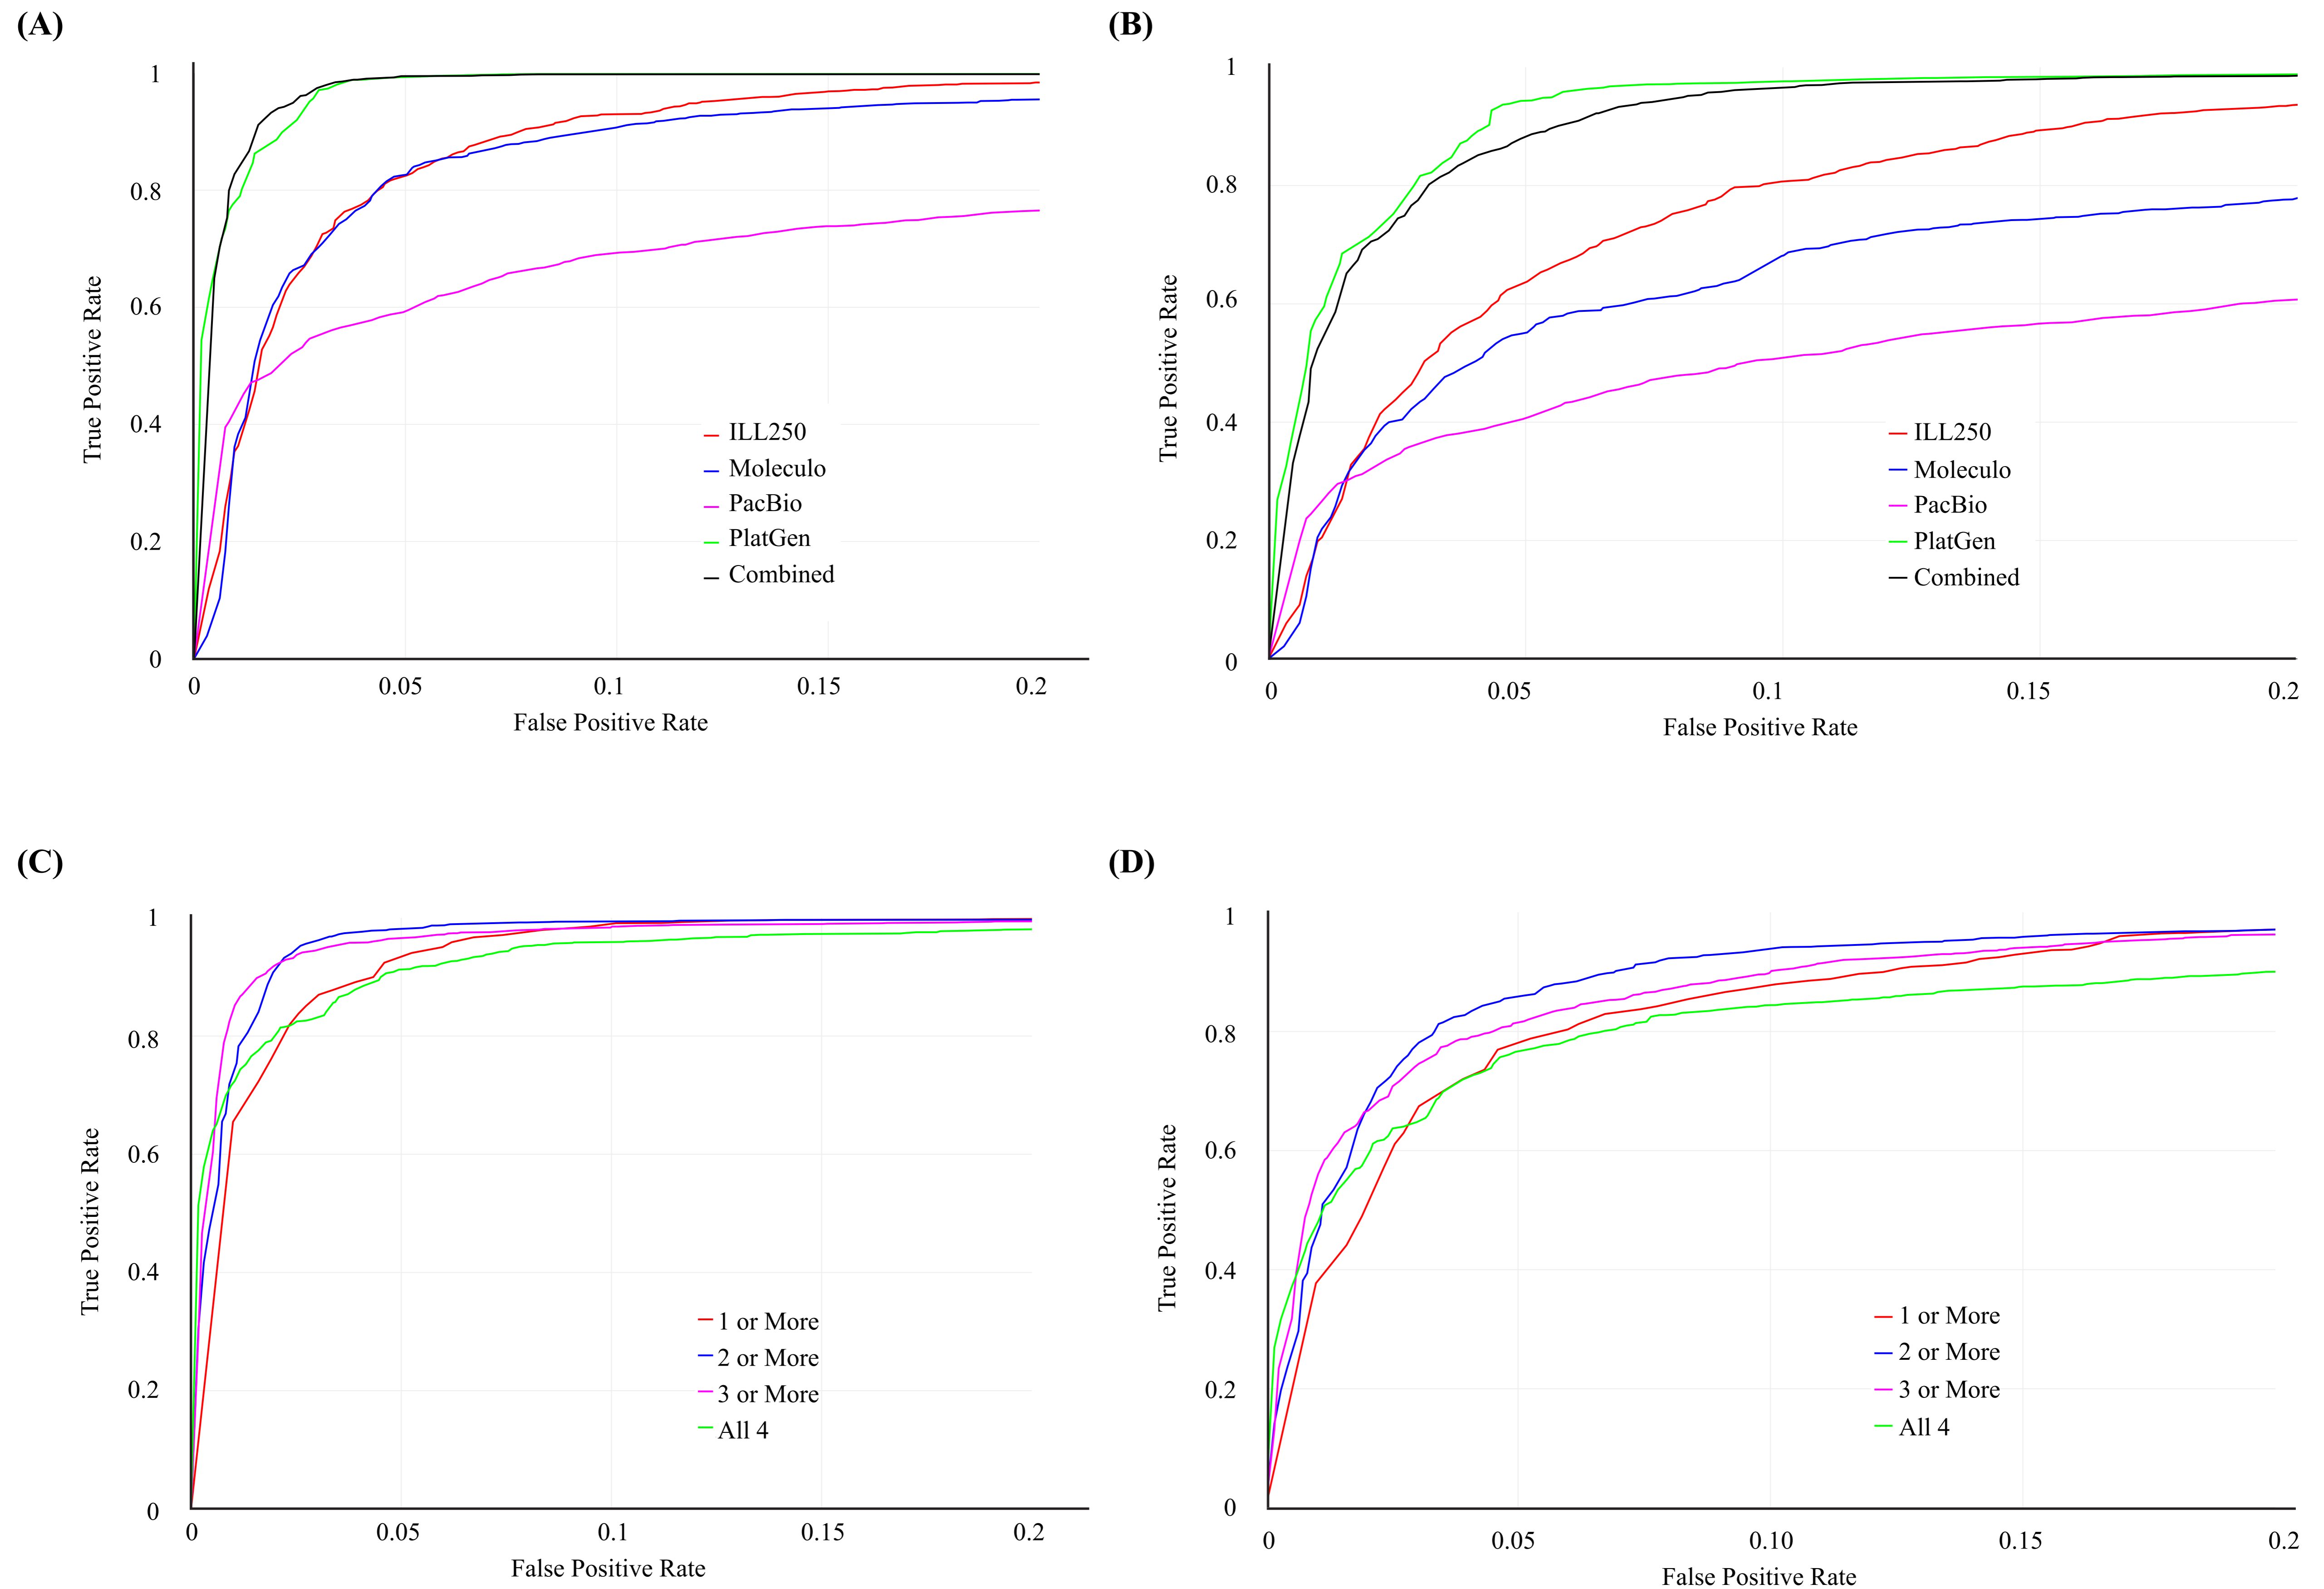

**Supplementary figure 2:** ROC curves for One-class classification using SVM, treating the 4000 Random regions as negatives and the Personalis or 1000 Genomes calls as positives. (A) ROC curves for one-class models for each dataset separately and for all combined for the Personalis validated deletion calls. (B) ROC curves for one-class models for each dataset separately and for all combined for the 1000 Genomes validated deletion calls. (C) ROC curves for one-class model requiring 1 or more, 2 or more, 3 or more, or all 4 technologies to have high classification scores for the Personalis validated deletion calls. (D) ROC curves for one-class model requiring 1 or more, 2 or more, 3 or more, or all 4 technologies to have high classification scores for the 1000 Genomes validated deletion calls. See original data at <https://plot.ly/233/~parikhhm/>, <https://plot.ly/242/~parikhhm/>, <https://plot.ly/250/~parikhhm/>, and <https://plot.ly/258/~parikhhm/>.
