# Supplementary material for: svclassify: a method to establish benchmark structural variant calls
Source: PubMed Central journal article supplement (PMC4715349; doi:10.1186/s12864-016-2366-2), 2016-01-16
Supplement: 12864_2016_2366_MOESM10_ESM.pdf [file 12864_2016_2366_MOESM10_ESM.pdf]

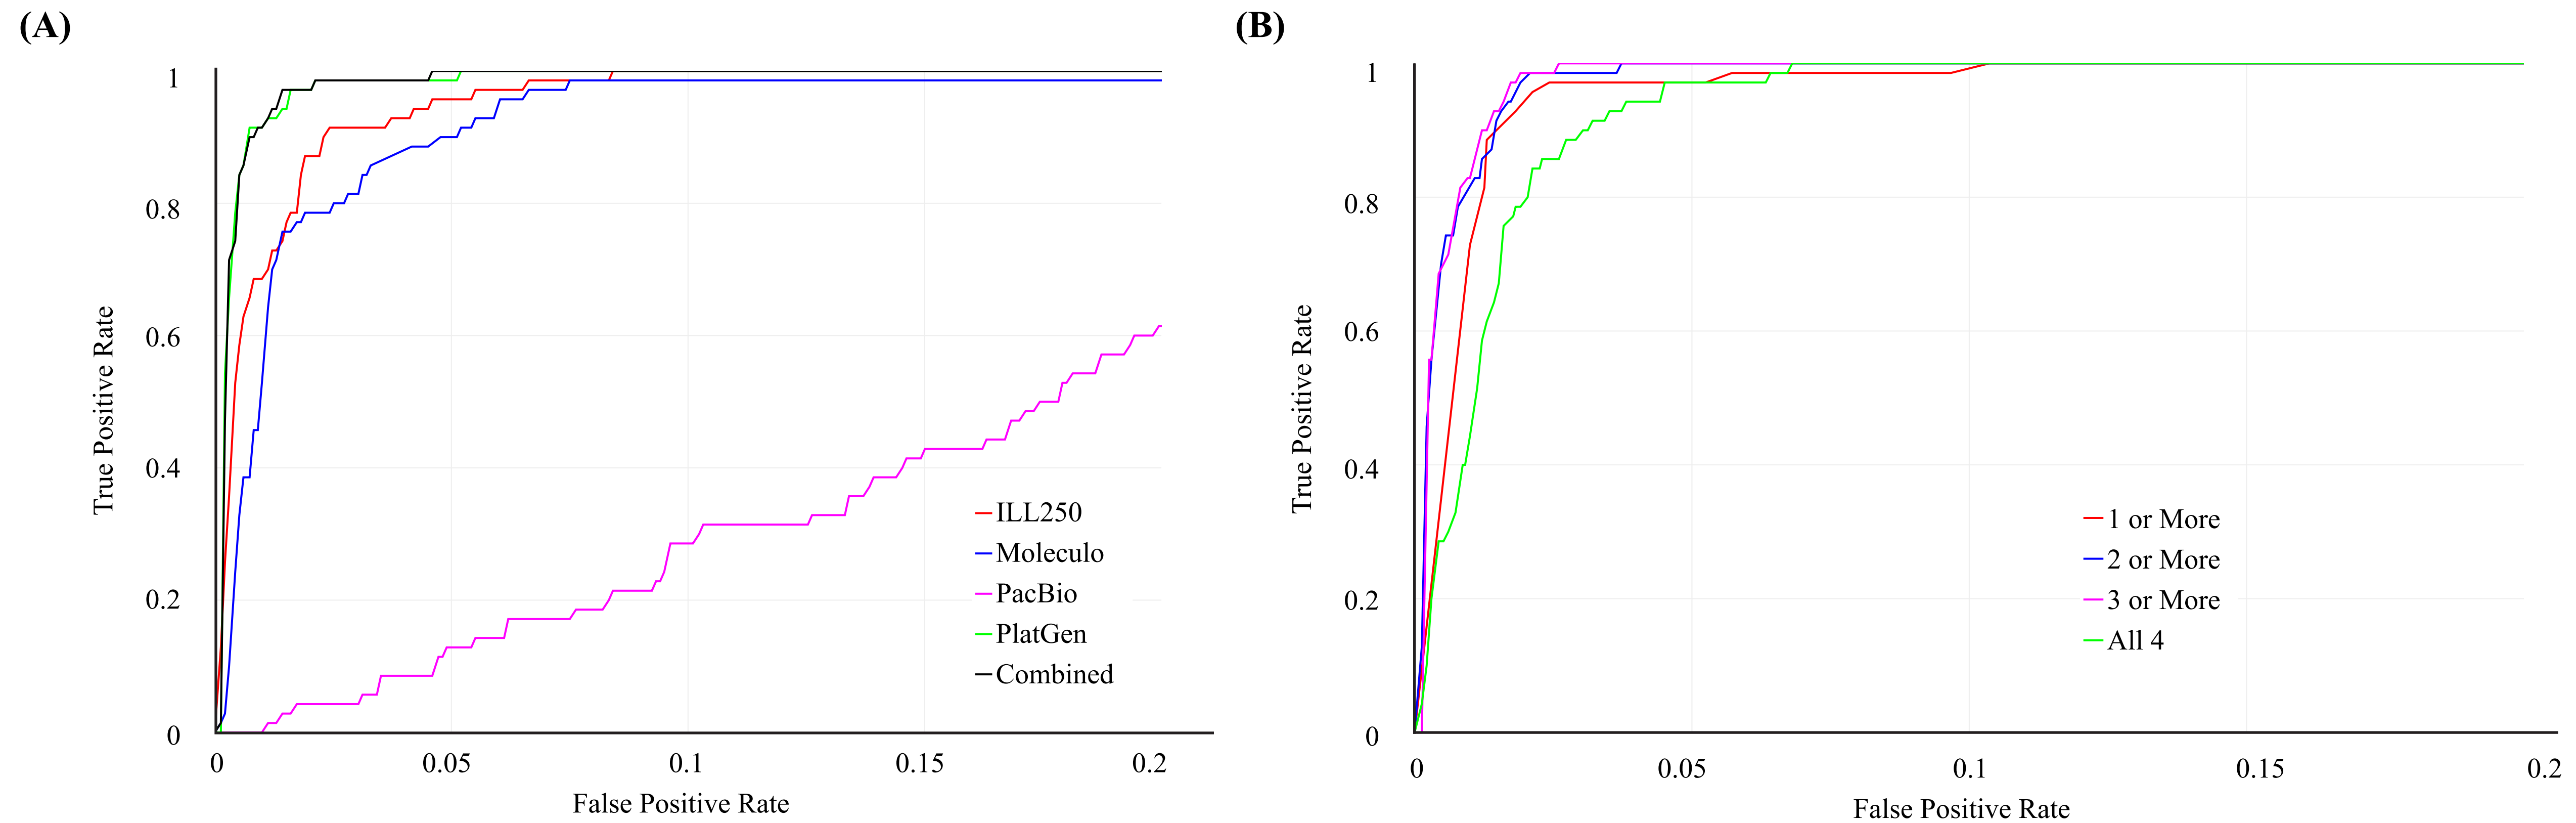

**Supplementary figure 5:** ROC curves for One-class classification using the L1 Distance, treating the 4000 random regions as negatives and the Spiral Genetics insertions calls as positives. (A) ROC curves for one-class models for each dataset separately and for all combined. (B) ROC curves for one-class model requiring 1 or more, 2 or more, 3 or more, or all 4 technologies to have high classification scores. See original data at <https://plot.ly/~desuchen0929/386>, and <https://plot.ly/330/~parikhhm/>.
