# Supplementary material for: svclassify: a method to establish benchmark structural variant calls
Source: PubMed Central journal article supplement (PMC4715349; doi:10.1186/s12864-016-2366-2), 2016-01-16
Supplement: 12864_2016_2366_MOESM21_ESM.pdf [file 12864_2016_2366_MOESM21_ESM.pdf]

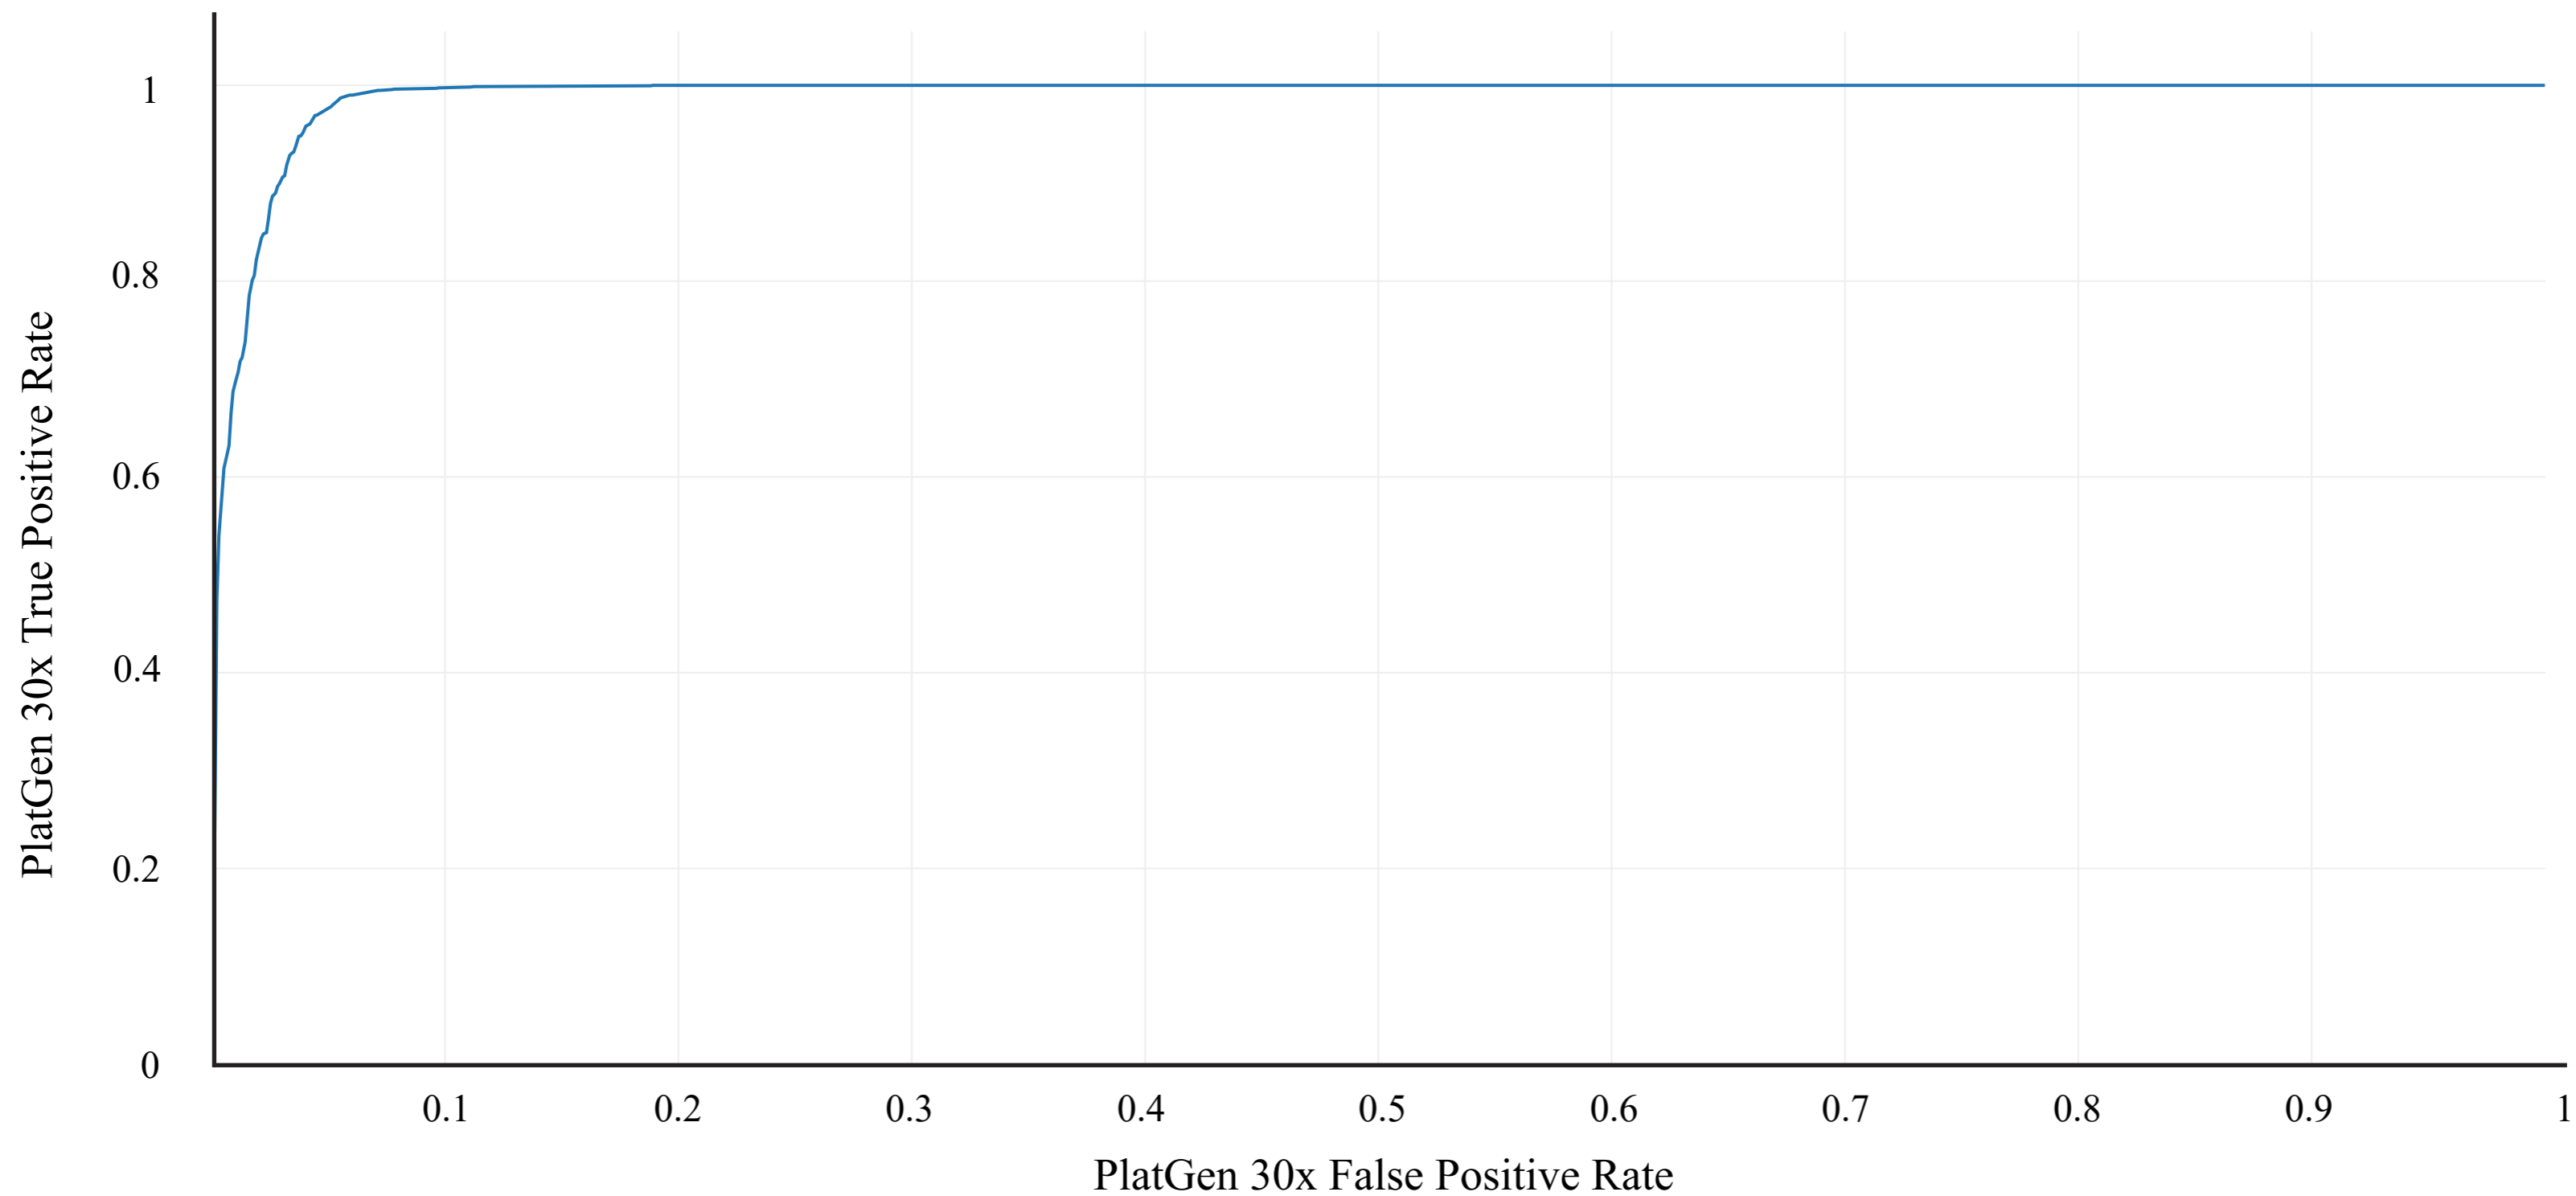

**Supplementary figure 7:** ROC curves for One-class classification using the L1 Distance, treating the 2306 Random regions (size distribution matching to Personalis) as negatives and the Personalis as positives using the Platinum down-sampling 30x data. See original data at <https://plot.ly/165/~parikhhm/>.
