# Supplementary material for: svclassify: a method to establish benchmark structural variant calls
Source: BMC Genomics. 2016 Jan 16;17:64. doi: 10.1186/s12864-016-2366-2 (PMC4715349; doi:10.1186/s12864-016-2366-2)
Supplement: Additional file 1: Table S1. — Annotations for each of the SV calls as well as likely non-SV regions from the Platinum Genomes 2x100bps HiSeq aligned sequence dataset for NA12878 using svclassify. (CSV 4 kb) [file 12864_2016_2366_MOESM1_ESM.csv]

Annotation	Included in One-class method	Included in unsupervised	Tail(s) that is associated with SVs (0=both, 1=left, 2=right)
SV_size	0	1	0
SV_Cat	0	0	0
L_Cov	1	1	0
L_Cov_sd	0	0	0
L_Cov_pro	0	0	0
L_Insert	0	0	0
L_Insert_sd	1	1	0
L_Insert_10_percentile	0	0	0
L_Insert_90_percentile	1	1	2
L_Dis_unmap	0	0	0
L_Dis_map	0	0	0
L_Dis_all	0	0	0
L_Dis_unmap_ratio	1	1	2
L_Dis_map_ratio	1	1	2
L_Mapping_q	0	0	1
L_Mapping_q_sd	0	0	0
L_Mapping_pro	0	0	0
L_Mapping_10_percentile	0	0	0
L_Mapping_90_percentile	0	0	0
L_Soft	0	0	0
L_Soft_sd	0	0	0
L_Soft_pro	1	1	0
L_Soft_10_percentile	0	0	0
L_Soft_90_percentile	1	1	2
L_Del	0	0	0
L_Del_sd	0	0	0
L_Del_10_percentile	0	0	0
L_Del_90_percentile	0	0	0
L_Ins	0	0	0
L_Ins_sd	0	0	0
L_Ins_10_percentile	0	0	0
L_Ins_90_percentile	0	0	0
L_Diff	0	0	0
L_Diff_sd	0	0	0
L_Diff_10_percentile	0	0	0
L_Diff_90_percentile	0	0	0
LM_Cov	1	1	0
LM_Cov_sd	0	0	0
LM_Cov_pro	0	0	0
LM_Insert	0	0	0
LM_Insert_sd	0	0	0
LM_Insert_10_percentile	0	0	0
LM_Insert_90_percentile	1	1	2
LM_Dis_unmap	0	0	0
LM_Dis_map	0	0	0
LM_Dis_all	0	0	0
LM_Dis_unmap_ratio	1	1	2
LM_Dis_map_ratio	1	1	2
LM_Mapping_q	0	0	1
LM_Mapping_q_sd	0	0	0
LM_Mapping_pro	0	0	0
LM_Mapping_10_percentile	0	0	0
LM_Mapping_90_percentile	0	0	0
LM_Soft	0	0	0
LM_Soft_sd	0	0	0
LM_Soft_pro	0	0	0
LM_Soft_10_percentile	0	0	0
LM_Soft_90_percentile	1	1	2
LM_Del	0	0	0
LM_Del_sd	0	0	0
LM_Del_10_percentile	0	0	0
LM_Del_90_percentile	0	0	0
LM_Ins	0	0	0
LM_Ins_sd	0	0	0
LM_Ins_10_percentile	0	0	0
LM_Ins_90_percentile	0	0	0
LM_Diff	0	0	0
LM_Diff_sd	0	0	0
LM_Diff_10_percentile	0	0	0
LM_Diff_90_percentile	0	0	0
M_Cov	1	1	0
M_Cov_sd	1	1	0
M_Cov_pro	0	0	0
M_Insert	0	0	0
M_Insert_sd	1	1	0
M_Insert_10_percentile	0	0	0
M_Insert_90_percentile	0	0	2
M_Dis_unmap	0	0	0
M_Dis_map	0	0	0
M_Dis_all	0	0	0
M_Dis_unmap_ratio	1	1	2
M_Dis_map_ratio	1	1	2
M_Mapping_q	0	1	1
M_Mapping_q_sd	0	0	0
M_Mapping_pro	0	0	0
M_Mapping_10_percentile	0	0	0
M_Mapping_90_percentile	0	0	0
M_Soft	0	0	0
M_Soft_sd	0	0	0
M_Soft_pro	1	1	0
M_Soft_10_percentile	0	0	0
M_Soft_90_percentile	0	0	2
M_Del	0	0	0
M_Del_sd	0	0	0
M_Del_10_percentile	0	0	0
M_Del_90_percentile	0	0	0
M_Ins	0	0	0
M_Ins_sd	0	0	0
M_Ins_10_percentile	0	0	0
M_Ins_90_percentile	0	0	0
M_Diff	0	0	0
M_Diff_sd	0	0	0
M_Diff_10_percentile	0	0	0
M_Diff_90_percentile	0	0	0
M_Cov_Cat	0	0	0
M_Homvar	0	0	0
M_Homvar_SV	1	1	2
M_Hetvar	0	0	0
M_Hetvar_SV	1	1	2
M_GCcontent	0	1	0
M_Sine_Line_Ltr_SV	0	1	2
M_Simple_Low_Satellite_SV	0	1	2
RM_Cov	1	1	0
RM_Cov_sd	0	0	0
RM_Cov_pro	0	0	0
RM_Insert	0	0	0
RM_Insert_sd	0	0	0
RM_Insert_10_percentile	0	0	0
RM_Insert_90_percentile	1	1	2
RM_Dis_unmap	0	0	0
RM_Dis_map	0	0	0
RM_Dis_all	0	0	0
RM_Dis_unmap_ratio	1	1	2
RM_Dis_map_ratio	1	1	2
RM_Mapping_q	0	0	1
RM_Mapping_q_sd	0	0	0
RM_Mapping_pro	0	0	0
RM_Mapping_10_percentile	0	0	0
RM_Mapping_90_percentile	0	0	0
RM_Soft	0	0	0
RM_Soft_sd	0	0	0
RM_Soft_pro	0	0	0
RM_Soft_10_percentile	0	0	0
RM_Soft_90_percentile	1	1	2
RM_Del	0	0	0
RM_Del_sd	0	0	0
RM_Del_10_percentile	0	0	0
RM_Del_90_percentile	0	0	0
RM_Ins	0	0	0
RM_Ins_sd	0	0	0
RM_Ins_10_percentile	0	0	0
RM_Ins_90_percentile	0	0	0
RM_Diff	0	0	0
RM_Diff_sd	0	0	0
RM_Diff_10_percentile	0	0	0
RM_Diff_90_percentile	0	0	0
R_Cov	1	1	2
R_Cov_sd	0	0	0
R_Cov_pro	0	0	0
R_Insert	0	0	0
R_Insert_sd	0	0	0
R_Insert_10_percentile	0	0	0
R_Insert_90_percentile	1	1	2
R_Dis_unmap	0	0	0
R_Dis_map	0	0	0
R_Dis_all	0	0	0
R_Dis_unmap_ratio	1	1	2
R_Dis_map_ratio	1	1	2
R_Mapping_q	0	0	1
R_Mapping_q_sd	0	0	0
R_Mapping_pro	0	0	0
R_Mapping_10_percentile	0	0	0
R_Mapping_90_percentile	0	0	0
R_Soft	0	0	0
R_Soft_sd	0	0	0
R_Soft_pro	0	0	0
R_Soft_10_percentile	0	0	0
R_Soft_90_percentile	1	1	2
R_Del	0	0	0
R_Del_sd	0	0	0
R_Del_10_percentile	0	0	0
R_Del_90_percentile	0	0	0
R_Ins	0	0	0
R_Ins_sd	0	0	0
R_Ins_10_percentile	0	0	0
R_Ins_90_percentile	0	0	0
R_Diff	0	0	0
R_Diff_sd	0	0	0
R_Diff_10_percentile	0	0	0
R_Diff_90_percentile	0	0	0
A short description of the annotations is provided in Supplemental table 16.
